## Lung separation and the difficult airway

J. B. Brodsky\*

Department of Anesthesia, H 3580, Stanford University Medical Center, Stanford, CA 94305, USA

\*E-mail: jbrodsky@stanford.edu

Selective collapse of a lung and one-lung ventilation (OLV) is now performed for most thoracic surgical procedures. Modern double-lumen endobronchial tubes and bronchial blockers have made lung separation safe and relatively easy to achieve. However, OLV in the patient with a 'difficult airway' can present a challenge to the anaesthesiologist. This review considers the different techniques used to achieve lung separation and their application to the patient with a difficult airway.

Br J Anaesth 2009; 103 (Suppl. 1): i66–i75

**Keywords:** difficult airway, laryngoscopy, intubation; equipment, fiberoptic bronchoscope, airway exchange catheter; lung separation, double-lumen tube, bronchial blocker, endobronchial tube

Anaesthesiologists are routinely requested to isolate and selectively ventilate a single lung. For most patients, lung separation is safe, easy to apply, and quickly accomplished. Thoracic surgeons have come to expect a collapsed lung and 'quiet' surgical field, and many of the newer, minimally invasive intrathoracic operations can only be accomplished with selective lung collapse. One-lung ventilation (OLV) is usually achieved with a double-lumen endobronchial tube (DLT) or a bronchial blocker (BB), and on rare occasions by endobronchial placement of a single-lumen tracheal tube (TT). For patients with easy access to their upper airway, the choice between a DLT and a BB is usually one of personal preference. However, for the patient with a 'difficult airway', one technique can be a better choice than another.

### Difficult airway

Although the American Society of Anesthesiologists Task Force's general definition of *difficult airway* is the 'clinical situation in which a conventionally trained anaesthesiologist experiences problems with (a) face mask ventilation of the upper airway, (b) tracheal intubation, or (c) both',<sup>96</sup> they also recognized that a standard, all encompassing definition of what is meant by 'difficult airway' does not exist.

The Task Force noted that the difficult airway represents a complex interaction between many factors, including those specific to the patient and the operation, the clinical situation, and the skills of the practitioner. For example, most anaesthesiologists consider a patient with a Cormack–Lehane grade III (epiglottis only) or grade IV

(soft palate only) views during conventional direct laryngoscopy to be 'difficult'. However, when placing a DLT, problems can be encountered in a patient with a grade II (partial glottis) view. For the thoracic surgical patient, direct laryngoscopy, tracheal intubation, or both might not be difficult, but lung separation can still be a problem, especially if the anaesthesiologist is unfamiliar or uncomfortable with what have been termed the 'difficult' tubes used for OLV.<sup>17</sup> What might be simple for an experienced thoracic anaesthesiologist can be challenging and fraught with complications when attempted by an inexperienced one.<sup>36</sup>

### Choice of tube

All anaesthesiologists must be familiar with the advantages and disadvantages of the different techniques and tubes used for lung separation (Table 1). As a general principle, if the trachea can be successfully intubated by any route with a sufficiently large TT, then lung separation should be achievable.

### Endobronchial tubes

After tracheal intubation, a single-lumen tube can be advanced into a bronchus to isolate that lung. Special double-cuffed, single-lumen endobronchial tubes (EBTs) were previously available for this purpose,<sup>3</sup> but they have been replaced by DLTs and BBs.<sup>45</sup>

EBTs have a narrow bronchial cuff and a relatively short distance from the proximal edge of that cuff to the distal tip of the tube. This design reduces the chance of upper-lobe obstruction. In contrast, TTs are not intended

for bronchial placement. Their *margin of safety*, defined as the length of the tracheobronchial tree over which a tube can be moved or positioned without obstructing a conducting airway, is very small. The distance from the proximal edge of the cuff of a TT to its tip is much longer than an EBT, and advancing a TT until its cuff is entirely within the bronchus will usually cause obstruction of the upper-lobe bronchus,<sup>75</sup> especially in the right main bronchus (Fig. 1A). Withdrawing the tube will result in a cuff in the trachea where it no longer can isolate the healthy lung (Fig. 1B).

In an emergency situation, an uncut conventional TT can be advanced into a bronchus to separate the lungs. Endobronchial placement of a TT should only be considered as a life-saving manoeuvre (airway haemorrhage, acute contralateral tension pneumothorax) when the lung must be isolated immediately;<sup>11</sup> for all situations, a DLT or BB is a better choice.

### Double-lumen tubes

Modern plastic, disposable DLTs offer many advantages for lung separation.<sup>43</sup> Their clear material allows

**Table 1** Advantages of DLTs and BBs

|                                                                                  |  |
|----------------------------------------------------------------------------------|--|
| <i>Double lumen tubes</i>                                                        |  |
| Easier to position                                                               |  |
| Can be positioned without bronchoscopy; bronchoscopy mandatory with BB           |  |
| Shorter time required to position than a BB                                      |  |
| More rapid lung collapse than with BB                                            |  |
| Less likely to be displaced than a BB                                            |  |
| Allows either lung to be ventilated, collapsed, and re-expanded                  |  |
| Each lung can be suctioned                                                       |  |
| Each lung can be inspected with a bronchoscope                                   |  |
| Continuous positive airway pressure easily applied to operated lung              |  |
| Enables split (independent) lung ventilation in ICU                              |  |
| <i>Bronchial blockers</i>                                                        |  |
| Can be used when a TT is already in place (oral, nasal, tracheostomy)            |  |
| Not necessary to change TT or Univent tube if postoperative ventilation required |  |
| Allows selective lobar blockade                                                  |  |
| Easier to use in smaller airways; technique of choice in paediatric patients     |  |

observation of moisture during ventilation, the presence of secretions or blood in either lumen, or both.<sup>30</sup> To aid in positioning, the blue bronchial cuff is easily visualized with a flexible fiberoptic bronchoscope (FOB). The bronchial cuff's high volume/low pressure properties reduce the danger of ischaemic pressure damage to airway.<sup>21 61 117</sup> The collapsed lung can be deflated and reinflated at will during the procedure. Material in the operated lung can be suctioned before reinflating the lung, and continuous positive airway pressure is easily applied during OLV.<sup>34</sup> A dislodged cuff of a DLT or BB balloon can obstruct ventilation to both lungs, allow contamination of the healthy lung, or both.<sup>106</sup> DLTs have fewer instances of dislodgement and can be positioned more rapidly than BBs.<sup>88</sup>

Human airway anatomy is asymmetric. The right main bronchus is much shorter (average 2.3 cm males, 2.1 cm females) than the left main bronchus (average 5.4 cm males, 5.0 cm females). For most thoracic procedures (left or right), a left DLT is preferred,<sup>32</sup> since it has a greater margin of safety than a right DLT.<sup>19</sup> A right DLT might be required when there is intrinsic (tumour) or extrinsic (tumour, aortic aneurysm) obstruction to the left main bronchus or when a left DLT will interfere with the procedure (left lung transplant, sleeve resection of left bronchus, and left bronchopleural fistula).<sup>38</sup> Many normal patients have a very short right main bronchus, and in a small percentage of the population, the right upper-lobe bronchus originates in the carina or trachea.<sup>67</sup> Placement of a right DLT can be difficult,<sup>121</sup> and modified right DLTs with larger upper-lobe ventilation slots<sup>31 79</sup> and specially designed right tubes<sup>56</sup> have been described for use in these patients.

In general, the largest DLT that can be atraumatically introduced into the bronchus should be chosen.<sup>63</sup> Larger DLTs cannot be advanced as far as thinner tubes, so there is less chance of upper-lobe obstruction.<sup>28</sup> Their larger lumens allow easier introduction of a suction catheter or an FOB, and offer less resistance to airflow during

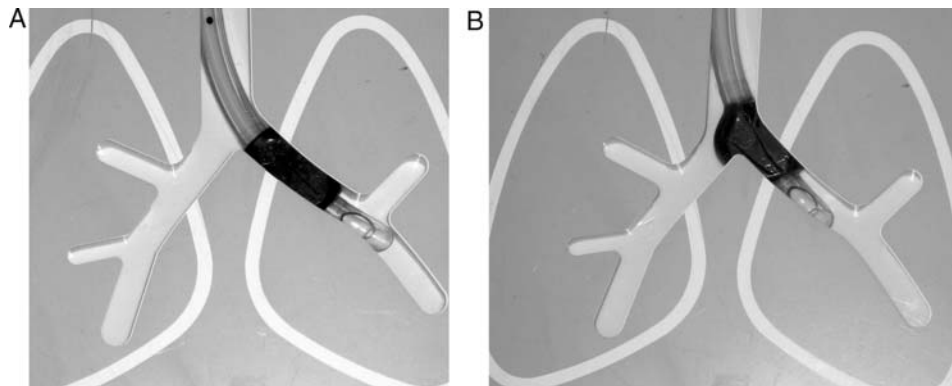

**Fig 1** The 'margin of safety', defined as the length of the tracheobronchial tree over which a tube can be moved or positioned without obstructing a conducting airway, is very small when a TT is used to isolate the lungs. (A) Advancing the tube until its cuff is entirely within the bronchus will cause the tip of the tube or the cuff to obstruct the bronchial orifice to the upper-lobe. (B) Withdrawing the tube until the upper-lobe is no longer obstructed will place the cuff in the trachea where it will no longer isolate the healthy lung.

OLV.<sup>118</sup> There is no absolutely accurate method for selecting the correct size tube. Age,<sup>114</sup> gender, height, or weight<sup>115</sup> are relatively poor predictors of airway size, and choosing a DLT based on these criteria often results in a tube that is either too large or too small. Direct measurement of bronchial width by chest radiography,<sup>26</sup> chest computed tomography,<sup>49</sup> or ultrasound<sup>122</sup> is a better way to select a DLT with appropriate dimensions.<sup>59 91 103</sup> Unfortunately, the left main bronchus is not visible on as many as 50% of chest radiographs.<sup>62</sup> When the bronchus cannot be directly measured, tracheal width can be used to estimate left-bronchial width.<sup>25</sup> The diameter of the left bronchus is directly proportional to the diameter of the trachea.<sup>27</sup> If tracheal width ( $W_T$ ) is known, left bronchial width ( $W_{LB}$ ) in millimetres can be calculated as  $W_{LB}=(0.4 \times W_T)+3.3$ .<sup>24</sup>

Plastic DLTs are moulded to conform to the shape of the airway ('memory' of the plastic). A DLT is straight for most of its length (for the trachea) with the distal endobronchial portion curved towards the bronchus. Since the distal end of the tube is inserted into the patient's mouth

under direct vision, the bronchial cuff is seldom lacerated. However, if the glottis is anterior, the fragile tracheal cuff is often torn by the patient's upper teeth during intubation attempts. To avoid damage to the tracheal cuff, and as an aid to access the airway, the stylet in the bronchial lumen should be bent, so that the tube assumes a 'hockey stick' shape before laryngoscopy. Direct laryngoscopy for DLT placement is best accomplished using a Macintosh laryngoscope blade,<sup>52</sup> since a curved laryngoscope blade offers a wider view and more space than a straight blade.

In the patient in whom conventional direct laryngoscopy is anticipated to be problematic, fiberoptic-assisted tracheal intubation has been recommended (Fig. 2). Either a TT or a DLT can be advanced directly over the FOB with the patient awake,<sup>92</sup> or anaesthetized after preoxygenation and induction of anaesthesia.<sup>53 112</sup>

After successful airway intubation, the DLT must be positioned in the appropriate bronchus. Although removal of the stylet in the bronchial lumen once the tip of the tube is past the glottis is recommended, there are no reports of airway trauma resulting from failure to remove

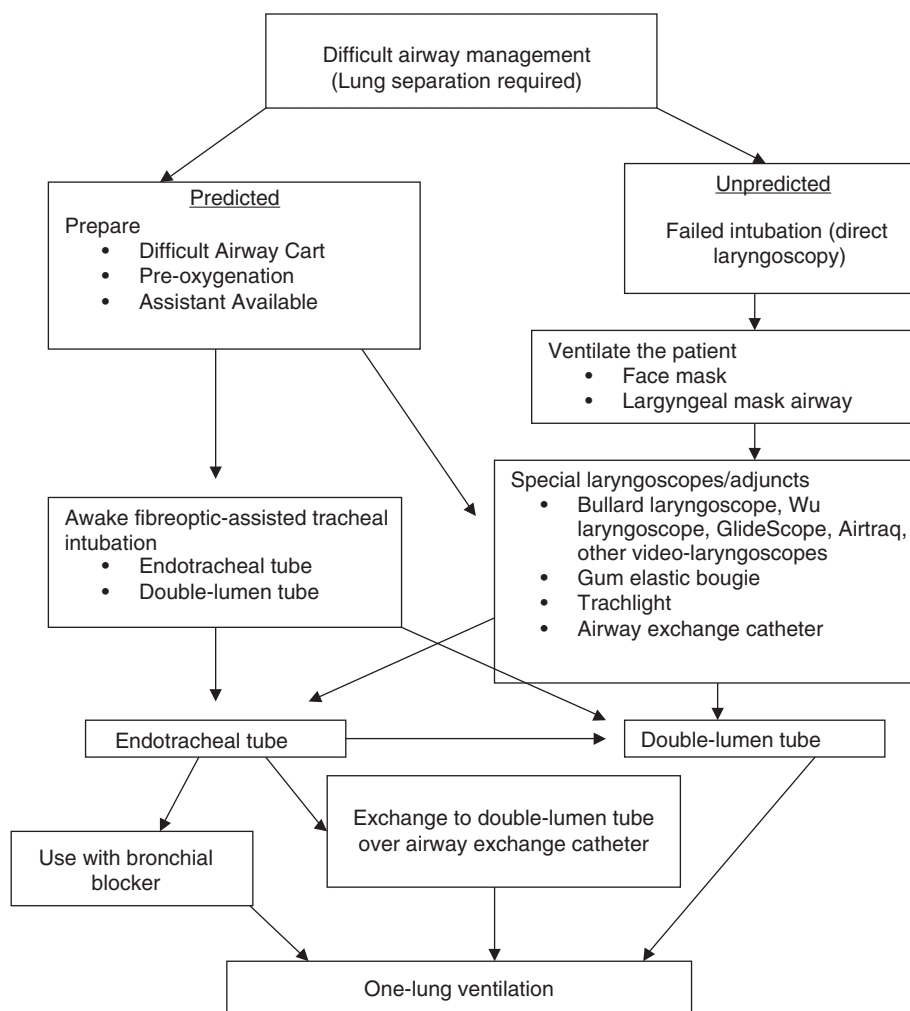

Fig 2 Algorithm for difficult airway management when lung separation is required.

the stylet.<sup>50</sup> Retaining the stylet allowed for more rapid, accurate placement in the bronchus with no increase in the incidence of tracheobronchial mucosa injury in one small study.<sup>78</sup>

Advancing the tube until moderate resistance is encountered will often result in a tube that is too deep in the bronchus, especially when a thin tube is used in a large airway. For both men and women, there is a very significant correlation between height and depth of DLT insertion.<sup>22</sup> Depth for placement of a left DLT ( $D_{LT}$ ) in centimetres can be calculated as  $D_{LT}=12.0+0.1[\text{height (in cm)}]$ .<sup>125</sup>

One advantage of DLTs is that they can be placed without an FOB.<sup>20</sup> This is particularly important in situations when lung separation is required and an appropriate size paediatric FOB is not available.<sup>10</sup> In most instances, DLT position is confirmed by advancing an FOB down the tracheal lumen to identify the blue bronchial cuff just below the carina in the appropriate bronchus.<sup>15 82</sup> The FOB should then be inserted down the bronchial lumen to demonstrate patency of the upper-lobe bronchus.<sup>116</sup> A paediatric FOB with an outside diameter (OD) small enough to fit in the lumen of the DLT must be available (Table 2). Proper fit should be confirmed before intubation.<sup>84</sup> A modification of this placement sequence utilizes the transparency of the plastic to position the tube.<sup>51</sup> The FOB is inserted down the bronchial lumen and position is adjusted, so that the carina lies midway between the black radiopaque line on a Broncho-Cath<sup>®</sup> (Mallinckrodt Medical, Athlone, Ireland) DLT and the proximal top of the bronchial cuff. Since tube position can change, especially after positioning of the patient, fiberoptic visualization in the supine position only confirms that the bronchial lumen is in the correct bronchus; DLT position must always be verified after the patient is turned to the lateral position.<sup>47</sup>

The bronchial cuff of the left DLT should require <3 ml of air to seal the airway if an appropriately large tube has been chosen.<sup>23</sup> If >3 ml of air is required, the cuff is likely in the trachea. The tension in the pilot balloon to the inflated bronchial cuff should be noted. If the tube subsequently becomes displaced,<sup>12</sup> the pilot balloon will soften because the cuff will then be partially or completely in the larger trachea.<sup>4 5</sup> DLT position can change

intraoperatively due to surgical manipulation,<sup>137</sup> changing patient head position,<sup>104</sup> or both, but turning the patient to the lateral position is a very common cause of outward tube movement.<sup>99</sup>

### Bronchial blockers

Lung tissue distal to an airway obstruction will collapse. With the introduction of modern BBs, there has been renewed interest in this old technique.<sup>33</sup> A BB can be advanced down or alongside a TT. Therefore, if the trachea is intubated orally,<sup>6 90</sup> nasally,<sup>2</sup> or through a tracheostomy<sup>57 74 83 132</sup> with a TT of sufficient internal diameter (ID), a BB can be used to separate the lungs. Bronchial blockade remains the 'technique of choice' in paediatric patients who are too small for the smallest (26–28 Fr) DLTs.<sup>57</sup>

Different balloon-tipped catheters, all intended for other purposes, have been used in adults<sup>55 97</sup> and children<sup>58 101</sup> for bronchial blockade. Catheters like the Fogarty<sup>®</sup> embolectomy catheter (Edwards Lifesciences, Irvine, CA, USA) are potentially problematic in this role because their inflated balloon exerts very high pressure on the airway. In contrast, newer BBs have low-pressure balloons,<sup>73 100</sup> and should be used except in emergency situations.

The Univent<sup>®</sup> tube (Fuji Systems, Tokyo, Japan/Vitaid, Toronto, Canada) is a conventional TT with a second lumen that contains a thin coaxial catheter.<sup>70 71</sup> Under FOB guidance, that catheter can be advanced past the TT into either bronchus.<sup>54 68 80</sup> A balloon at its tip, when inflated, functions as a BB. The catheter itself, the TCB Uniblocker<sup>®</sup> (Fuji Systems/Vitaid), is also sold independently of the Univent tube.<sup>126</sup>

The Arndt Endobronchial Blocker<sup>®</sup> (Cook Critical Care, Bloomington, IN, USA) is a balloon-tipped catheter with an inner lumen that contains a flexible wire. The wire passes from the proximal end of the catheter and exits past the distal end as a flexible wire-loop.<sup>7–9 69</sup> The wire-loop is coupled with an FOB to guide the blocker into the bronchus. Once the blocker is positioned, the FOB is removed from the TT, the wire loop is withdrawn into the lumen of the catheter, and the balloon is inflated. A special three-part swivel adaptor (Arndt Multi-port Adaptor<sup>®</sup>, Cook Critical Care) allows introduction of an FOB through one port, the BB through a second port, and a third port connects the TT to the ventilation circuit. This system simplifies simultaneous connection of the anaesthesia circuit and passage of the FOB and a BB through a TT.<sup>76</sup>

The Cohen Endobronchial Blocker<sup>®</sup> (Cook Critical Care) has a catheter shaft which is bonded at its distal end to a 3 cm soft nylon flexible tip. This tip can be deflected >90° by a counterclockwise rotation of a wheel positioned at the proximal end of the catheter to direct the distal blocker balloon into either bronchus.<sup>42 102</sup>

**Table 2** Compatibility of FOBs with different size DLTs. FOB, fiberoptic bronchoscope; DLT, double-lumen tube; Fr, French size; OD, outer diameter (mm). Adapted from Merli and colleagues<sup>84</sup>

| DLT   | FOB        |
|-------|------------|
| 41 Fr | 4.2–4.5 OD |
| 39 Fr | 3.9–4.2 OD |
| 37 Fr | 3.5–3.9 OD |
| 35 Fr | 2.8–3.2 OD |
| 32 Fr | 2.8–3.2 OD |
| 28 Fr | 1.8–2.5 OD |
| 26 Fr | 1.8–2.5 OD |

An FOB is always required to place a BB. Optimally, both the BB and the FOB should fit within a large TT in order to be able to ventilate the patient during blocker placement. If a small ID TT is used, the BB can be advanced alongside the TT whereas the FOB is advanced down the tube.<sup>13 87</sup> When the airway is so small that it cannot accommodate both a TT and an FOB simultaneously, the BB and FOB can be advanced down the airway and the BB positioned. The FOB is then removed and a TT is placed in the airway (Fig. 3).

### Lung separation and the difficult airway

It is important to remember that *absolute* indications for lung separation are limited to situations when the healthy lung must be protected from life-threatening contamination, or when positive pressure ventilation of the trachea is impossible due to tracheal or bronchial damage. Although many surgical procedures are more easily performed with the lung collapsed, if placement of a DLT or BB is problematic, one must consider the safety and need for lung separation. Surgical preference alone is an insufficient reason to jeopardize a patient.

#### Airway intubation

For most patients, a 'difficult airway' is synonymous with *difficult airway intubation*. For a patient with known or predicted difficult airway access, it is usually best to first

intubate the airway with a TT. Then if OLV is considered a high priority, the decision can be made to proceed using a BB or to substitute a DLT for the TT (Fig. 2).<sup>37 93</sup> Bronchial blockade is always an option when a DLT cannot be placed, but the airway is accessible to a TT. Examples include patients with very limited mouth opening or in whom only a nasotracheal intubation is possible. For a patient with a tracheostomy, lung separation can be obtained with a BB through a TT or tracheostomy tube,<sup>40 120 131</sup> with a conventional DLT (Fig. 4A),<sup>98 109 113</sup> or with short DLTs intended for tracheostomies (Fig. 4B).<sup>29 127</sup>

An FOB must be available, and the anaesthesiologist must be familiar with both normal and abnormal airway anatomy.<sup>35</sup> When tracheal intubation by conventional laryngoscopy is difficult, awake FOB-assisted TT tracheal intubation has historically been the safest means of securing the airway.<sup>16</sup> However, there have been important recent advances with fiberoptic systems and video technology. New video-laryngoscopes including the GlideScope® (Verathon Medical, Bothell, WA, USA), Pentax Airway laryngoscope® (Pentax, Hoya, Tokyo, Japan), Airtraq® (Prodol/King Systems Corp., Noblesville, IN, USA), LMA CTrach® (LMA North America, Inc., San Diego, CA, USA), McGrath® video laryngoscope (Aircraft Medical/LMA North America), and many others are now available. These devices are proving useful in difficult intubation situations.<sup>105</sup> Protocols are changing and videoscopes are replacing bronchoscopy as the first choice for accessing the difficult airway both for TTs and for DLTs.<sup>81 95 128 130</sup>

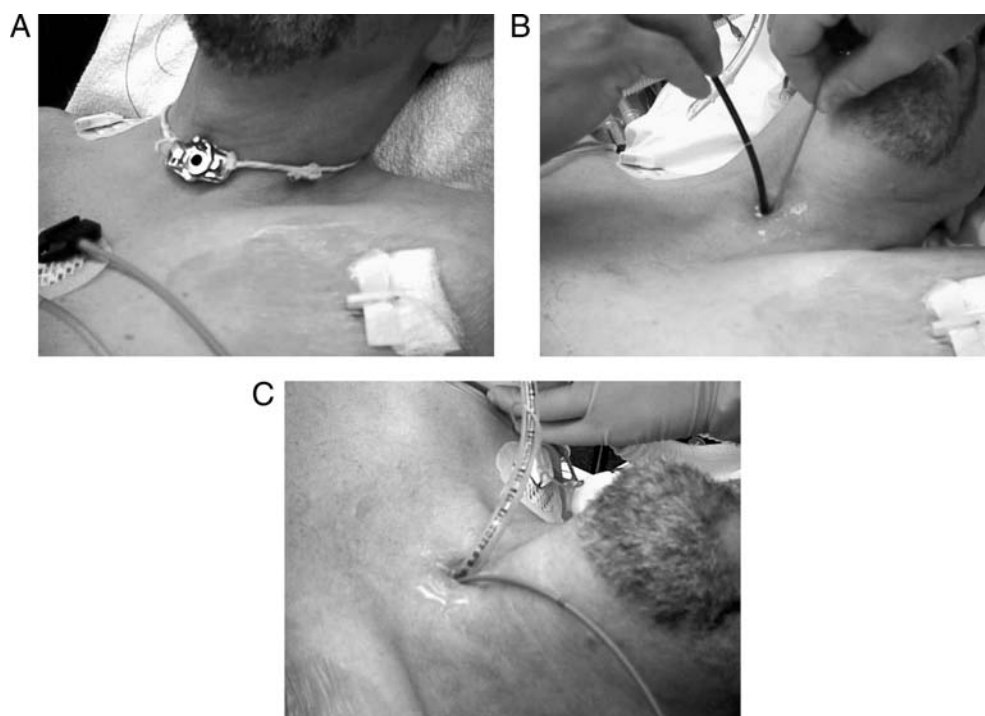

**Fig 3** (A) A patient with an extremely small tracheal stoma required lung separation. (B) After preoxygenation and induction of anaesthesia, a paediatric FOB and a BB were placed directly through the stoma and the blocker was positioned in the bronchus. (C) The bronchoscope was then removed, the balloon of the bronchial blocker was inflated, and a small TT was inserted through the tracheostomy stoma to ventilate the patient.

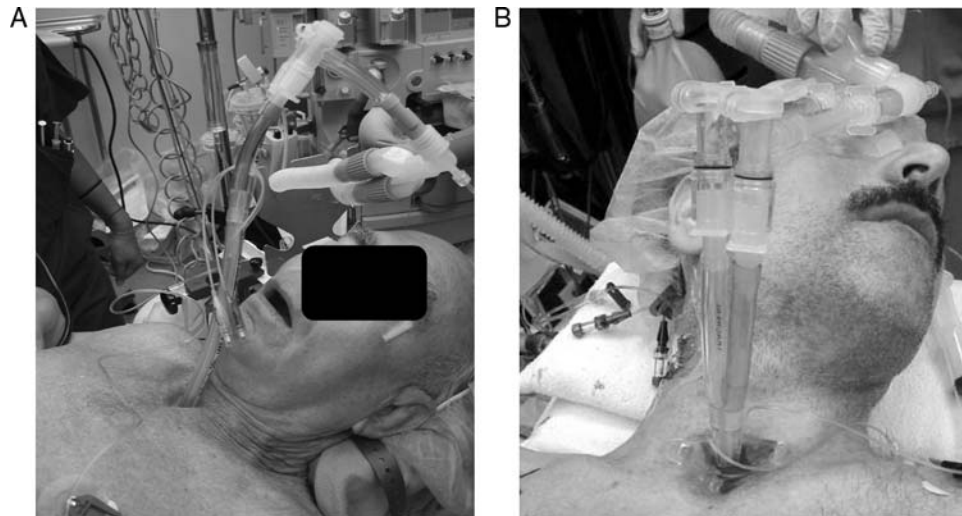

**Fig 4** For a patient with a tracheostomy, lung separation can be obtained with a BB through a TT or tracheostomy tube directly in the stoma, with a conventional DLT (A) or with a short DLT intended for tracheostomies (B).

DLT placement in patients with anticipated or proven difficult direct laryngoscopy has been reported with the Bullard<sup>®</sup> laryngoscope (Gyrus ACMI, Inc., Norwalk, OH, USA),<sup>111</sup> the WuScope<sup>®</sup> (ACHI Corp, San Jose, CA, USA),<sup>119</sup> the GlideScope,<sup>39 64</sup> the Pentax Airway laryngoscope,<sup>94 123</sup> the Airtraq,<sup>66</sup> and the Bonfils<sup>®</sup> intubation fiberscope (Karl Storz GmbH, Tuttlingen, Germany).<sup>14</sup> Successful placement has also been achieved using lighted stylets,<sup>41 89 108 136</sup> and other approaches.<sup>1 107 134</sup> Special techniques require practice, especially before attempting them with a DLT in a patient with a difficult airway. The technique most familiar to the anaesthesiologist is usually the best choice.

#### *Airway exchange catheters*

An airway guide or airway exchange catheter (AEC) is an essential piece of equipment for thoracic anaesthesia (Table 3). A gum elastic bougie,<sup>77</sup> an Aintree<sup>®</sup> catheter (Cook Critical Care),<sup>65</sup> or other guides facilitate direct tracheal intubation with a TT, and the Frova<sup>®</sup> intubating catheter (Cook Critical Care) has been used for DLTs,<sup>133</sup> in patients with Cormack–Lehane grade II or III views during laryngoscopy. The AEC also facilitates changing from a TT to a DLT before surgery and back to a TT at the completion of surgery if postoperative ventilation is necessary.<sup>60</sup> The AEC must be of sufficient length to ensure tracheal introduction of the DLT. Considering the length of the DLT, the distance down the airway to the lower trachea, and additional length needed at its proximal end for control of the tube, the AEC must be >70 cm long. AECs of various lengths and sizes are available. The AEC must have a relatively large OD in relation to a DLT with a relatively small ID for the DLT to successfully follow the guide into the airway. The fit of the AEC in the DLT must be confirmed before attempting tube exchange.

**Table 3** Guidelines for using an AEC. AEC, airway exchange catheter

|                                                                                                                            |
|----------------------------------------------------------------------------------------------------------------------------|
| Select an AEC of at least 70 cm length when using with a DLT                                                               |
| Choose an AEC with a relatively large OD in relationship to a tube with a relatively small ID                              |
| Lubricate the AEC                                                                                                          |
| Test the fit between the AEC and the tube before attempting tube exchange                                                  |
| Never advance the AEC against resistance                                                                                   |
| Use a laryngoscope to lift supraglottic tissue to facilitate tube passage at the glottis                                   |
| If passage is obstructed, rotate the tube 90° counterclockwise to avoid arytenoid or vocal cord impingement                |
| Note the depth markings on both the AEC and <i>in situ</i> tube; never insert the AEC deeper than 25–26 cm into the airway |
| Have a system for jet ventilation available if the tube cannot be advanced                                                 |

When a thin AEC is used to change to or from a TT, resistance to passage of the tube at the glottis can occur. A laryngoscope should be used to lift supraglottic tissue to help the tube negotiate the angle between the pharynx and the larynx to facilitate passage of the tube over the guide.<sup>48</sup> A counterclockwise rotation of the tube will disengage it, if it is temporarily stuck at the glottis.<sup>72</sup> Two thin AECs, with one inserted in the tracheal lumen and the other in the bronchial lumen, combined with 90° counterclockwise rotation of the DLT reduces the incidence of glottic impingement.<sup>124</sup>

To avoid airway perforation, the AEC should never be advanced against resistance.<sup>46 110</sup> All AEC DLT guides have depth markings on their shaft to monitor the depth of insertion. Although placement of the AEC in a more distal airway decreases the chance of the catheter slipping out of the trachea during tube exchange, it is safer for the guide to remain above the carina in the lower trachea to avoid laceration of the bronchus. The AEC should not be inserted beyond the 25 cm mark at the teeth in adults.<sup>129</sup>

Most AECs have a small lumen that allows oxygen insufflation or jet ventilation. A jet ventilator should be

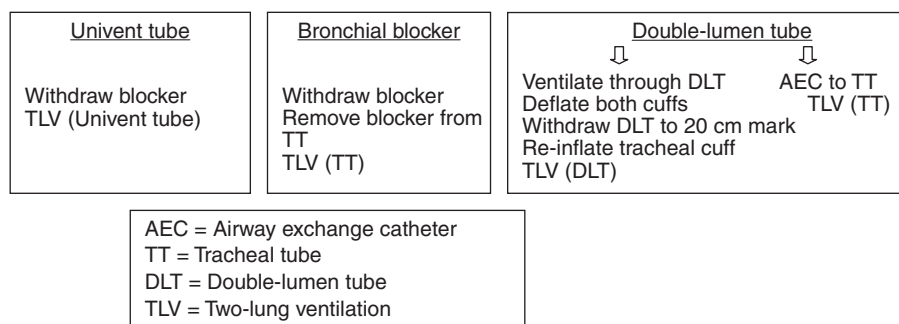

Fig 5 Airway control at completion of surgery for patients requiring postoperative mechanical ventilation.

available if the tube does not follow the guide into the trachea. The ventilator should be set at 25 psi with an in-line regulator. A short (1 s) inspiratory time, low pressure, and sufficiently long expiratory time can be life saving.<sup>44</sup> It is essential the AEC be in the trachea and not the bronchus before instituting jet ventilation to avoid barotrauma.

### Completion of surgery

Airway extubation at the completion of surgery is another critical event, especially for patients in whom initial access to the airway was difficult. Depending on the type and length of surgery and the amount of fluid administered, even an airway not considered difficult at the beginning can become one by the end of the procedure. The presence of any mucosal oedema, bleeding, or retained secretions can further complicate an already challenging situation. Continuous access to the airway should be maintained. The TT or DLT can be removed over a thin guide, but with the guide remaining in the trachea to allow immediate access to the airway if reintubation is needed.<sup>86</sup>

For the patient who has a DLT but requires postoperative ventilation, a decision must be made whether to keep the DLT or exchange it for a TT (Fig. 5). A DLT can be used in the critical care setting for selective OLV<sup>85</sup> or for two-lung ventilation (TLV), if exchange to a TT is considered too risky. The bronchial cuff can be deflated to allow TLV, or both cuffs can be deflated and the tip of the DLT withdrawn above the carina. In this position, only the tracheal cuff is reinflated for TLV.

Alternately, the DLT can be exchanged to a TT using the same techniques described for the start of surgery. Tube exchange should be performed under vision with a laryngoscope if possible.<sup>18</sup> Failure to successfully exchange the tubes can result in an extubated airway. In this situation, a laryngeal mask airway can be used to ventilate the patient.<sup>135</sup> Of course, if a Univent tube or BB was used during the procedure, the blocker balloon need only be deflated and the BB catheter withdrawn before instituting TLV through the TT.

### References

- 1 Alfery DD. Double-lumen endobronchial tube intubation using a retrograde wire technique. *Anesth Analg* 1993; **76**: 1374–5
- 2 Angie Ho CY, Chen CY, Yang MW, Liu HP. Use of the Arndt wire-guided endobronchial blocker via nasal for one-lung ventilation in patient with anticipated restricted mouth opening for esophagectomy. *Eur J Cardiothorac Surg* 2005; **28**: 174–5
- 3 Aps C, Towey RM. Experiences with fibre-optic bronchoscopic positioning of single-lumen endobronchial tubes. *Anaesthesia* 1981; **36**: 415–8
- 4 Araki K, Nomura R, Urushibara R, Yoshikawa Y, Hatano Y. Displacement of the double-lumen endobronchial tube can be detected by bronchial cuff pressure change. *Anesth Analg* 1997; **84**: 1349–53
- 5 Araki K, Nomura R, Urushibara R, Yoshikawa Y, Hatano Y. Bronchial cuff pressure change caused by left-sided double-lumen endobronchial tube displacement. *Can J Anaesth* 2000; **47**: 775–9
- 6 Arndt GA, Buchika S, Kranner PW, De Lessio ST. Wire-guided endobronchial blockade in a patient with a limited mouth opening. *Can J Anaesth* 1999; **46**: 87–9
- 7 Arndt GA, DeLessio ST, Kranner PW, Orzepowski W, Ceranski B, Valtysson B. One-lung ventilation when intubation is difficult—presentation of a new endobronchial blocker. *Acta Anaesthesiol Scand* 1999; **43**: 356–8
- 8 Arndt GA, Kranner PW, Lorenz D. Co-axial placement of endobronchial blocker. *Can J Anaesth* 1994; **41**: 1126–7
- 9 Arndt GA, Kranner PW, Rusy DA, Love R. Single-lung ventilation in the critically ill patient using fiberoptically directed wire-guided endobronchial blocker. *Anesthesiology* 1999; **90**: 1484–6
- 10 Bahk JH, Lim YJ, Kim CS. Positioning of a double-lumen endobronchial tube without the aid of any instruments: an implication for emergency management. *J Trauma* 2000; **49**: 899–902
- 11 Bair AE, Doherty MJ, Harper R, Albertson TE. An evaluation of a blind rotational technique for selective mainstem intubation. *Acad Emerg Med* 2004; **11**: 1105–7
- 12 Bardoczky GI, Levarlet M, Engelman E, deFrancquen P. Continuous spirometry for detection of double-lumen endobronchial tube displacement. *Br J Anaesth* 1993; **70**: 499–502
- 13 Bastien JL, O'Brien JG, Frantz FW. Extraluminal use of the Arndt pediatric endobronchial blocker in an infant: a case report. *Can J Anaesth* 2006; **53**: 159–61
- 14 Bein B, Caliebe D, Römer T, Scholz J, Dörges V. Using the Bonfils intubation fiberscope with a double-lumen tracheal tube. *Anesthesiology* 2005; **102**: 1290–1
- 15 Benumof JL. Fiberoptic bronchoscopy and double-lumen tube position. *Anesthesiology* 1986; **65**: 117–8

- 16 Benumof JL. Management of the difficult adult airway. With special emphasis on awake tracheal intubation. *Anesthesiology* 1991; **75**: 1087–110
- 17 Benumof JL. Difficult tubes and difficult airways. *J Cardiothorac Vasc Anesth* 1998; **12**: 131–2
- 18 Benumof JL. Airway exchange catheters: simple concept, potentially great danger. *Anesthesiology* 1999; **91**: 342–4
- 19 Benumof JL, Partridge BL, Salvatierra C. Margin of safety in positioning modern double-lumen endotracheal tubes. *Anesthesiology* 1987; **67**: 729–38
- 20 Brodsky JB. Fiberoptic bronchoscopy need not be a routine part of double-lumen tube placement. *Curr Opin Anaesthesiol* 2004; **17**: 7–11
- 21 Brodsky JB, Adkins MO, Gaba DM. Bronchial cuff pressures of double-lumen tubes. *Anesth Analg* 1989; **69**: 608–10
- 22 Brodsky JB, Benumof JL, Ehrenwerth J. Depth of placement of left double-lumen endobronchial tubes. *Anesth Analg* 1991; **73**: 570–2
- 23 Brodsky JB, Lemmens HJM. Left double-lumen tubes: clinical experience with 1,170 patients. *J Cardiothorac Vasc Anesth* 2003; **17**: 289–98
- 24 Brodsky JB, Lemmens HJM. Tracheal width and left double-lumen tube size: a formula to estimate left-bronchial width. *J Clin Anesth* 2005; **17**: 267–70
- 25 Brodsky JB, Macario A, Mark JBD. Tracheal diameter predicts double-lumen tube size: a method for selecting left double-lumen tubes. *Anesth Analg* 1996; **82**: 861–4
- 26 Brodsky JB, Mackey S, Cannon WB. Selecting the correct size left double-lumen tube. *J Cardiothorac Vasc Anesth* 1997; **11**: 924–5
- 27 Brodsky JB, Malott K, Angst M, Fitzmaurice BG, Kee SP, Logan L. The relationship between tracheal width: implications for left-sided double-lumen tube selection. *J Cardiothorac Vasc Anesth* 2001; **15**: 216–7
- 28 Brodsky JB, Shulman MS, Mark JBD. Malposition of left-sided double-lumen endobronchial tubes. *Anesthesiology* 1985; **62**: 667–9
- 29 Brodsky JB, Tobler HG, Mark JB. A double-lumen endobronchial tube for tracheostomies. *Anesthesiology* 1991; **74**: 387–8
- 30 Burton NA, Watson DC, Brodsky JB, Mark JB. Advantages of a new polyvinyl chloride double-lumen tube in thoracic surgery. *Ann Thorac Surg* 1983; **36**: 78–84
- 31 Bussi eres JS, Lacasse Y, C ot e D, et al. Modified right-sided Broncho-Cath double lumen tube improves endobronchial positioning: a randomized study. *Can J Anaesth* 2007; **54**: 276–82
- 32 Campos JH. Lung isolation techniques. *Anesthesiol Clin North Am* 2001; **19**: 455–74
- 33 Campos JH. An update on bronchial blockers during lung separation techniques in adults. *Anesth Analg* 2003; **97**: 1266–74
- 34 Campos JH. Which device should be considered the best for lung isolation: double-lumen endotracheal tube versus bronchial blockers. *Curr Opin Anaesthesiol* 2007; **20**: 27–31
- 35 Campos JH. Update on tracheobronchial anatomy and flexible fiberoptic bronchoscopy in thoracic anesthesia. *Curr Opin Anaesthesiol* 2009; **22**: 4–10
- 36 Campos JH, Hallam EA, Van Natta T, Kernstine KH. Devices for lung isolation used by anesthesiologists with limited thoracic experience: comparison of double-lumen endotracheal tube, Univent torque control blocker, and Arndt wire-guided endobronchial blocker. *Anesthesiology* 2006; **104**: 261–6
- 37 Campos JH, Kernstine KH. A comparison of a left-sided Broncho-Cath with the torque control blocker Univent<sup>®</sup> and the wire-guided blocker. *Anesth Analg* 2003; **96**: 283–9
- 38 Campos JH, Massa C. Is there a better right-sided tube for one-lung ventilation? A comparison of the right-sided double lumen tube with the single-lumen tube with right-sided enclosed bronchial blocker. *Anesth Analg* 1998; **86**: 696–700
- 39 Chen A, Lai HY, Lin PC, Chen TY, Shyr MH. Glidescope-assisted double-lumen endobronchial tube placement in a patient with an unanticipated difficult airway. *J Cardiothorac Vasc Anesth* 2008; **22**: 170–2
- 40 Chen KP, Chan HC, Huang SJ. Foley catheter used as bronchial blocker for one lung ventilation in a patient with tracheostomy: a case report. *Acta Anaesthesiol Sin* 1995; **33**: 41–4
- 41 Chen KY, Tsao SL, Lin SK, Wu HS. Double-lumen endobronchial tube intubation in patients with difficult airways using Trachlight and a modified technique. *Anesth Analg* 2007; **105**: 1425–6
- 42 Cohen E. The Cohen flexitip endobronchial blocker: an alternative to a double lumen tube. *Anesth Analg* 2005; **101**: 1877–9
- 43 Cohen E. Recommendations for airway control and difficult airway management in thoracic anesthesia and lung separation procedures. Are we ready for the challenge? *Minerva Anesthesiol* 2009; **75**: 3–5
- 44 Cohen E, Benumof JL. Lung separation in the patient with a difficult airway. *Curr Opin Anaesthesiol* 1999; **12**: 29–35
- 45 Conacher ID, Velasquez H, Morrice DJ. Endobronchial tubes—a case for re-evaluation. *Anaesthesia* 2006; **61**: 587–90
- 46 DeLima L, Bishop M. Lung laceration after tracheal extubation over a plastic tube exchanged. *Anesth Analg* 1991; **73**: 350–1
- 47 Desiderio DP, Burt M, Kolker AC, Fischer ME, Reinsel R, Wilson RS. The effects of endobronchial cuff inflation on double-lumen endobronchial tube movement after lateral decubitus positioning. *J Cardiothorac Vasc Anesth* 1997; **11**: 595–8
- 48 Dogra S, Falconer R, Latto IP. Successful difficult intubation. Tracheal tube placement over a gum-elastic bougie. *Anaesthesia* 1990; **45**: 774–6
- 49 Eberle B, Weiler N, Vogel N, Kauczor HU, Heinrichs W. Computed tomography-based tracheobronchial image reconstruction allows selection of the individually appropriate double-lumen tube size. *J Cardiothorac Vasc Anesth* 1999; **13**: 532–7
- 50 Fitzmaurice BG, Brodsky JB. Airway rupture from double-lumen tubes. *J Cardiothorac Vasc Anesth* 1999; **13**: 322–9
- 51 Fortier G, Cot e D, Bergeron C, Bussi eres JS. New landmarks improve the positioning of the left Broncho-Cath double-lumen tube—comparison with the classic technique. *Can J Anaesth* 2001; **48**: 790–4
- 52 Gaeta RR, Brodsky JB. A new laryngoscopy blade to facilitate double-lumen tube placement. *J Cardiothorac Vasc Anesth* 1991; **5**: 418–9
- 53 Gatell JA, Barst SM, Desiderio DP, Kolker AC, Scher CS. A new technique for replacing an endobronchial double-lumen tube with an endotracheal single-lumen tube. *Anesthesiology* 1990; **73**: 340–1
- 54 Gayes JM. Pro: one-lung ventilation is best accomplished with the Univent endotracheal tube. *J Cardiothorac Vasc Anesth* 1993; **7**: 103–7
- 55 Ginsberg RJ. New technique for one-lung anesthesia using an endobronchial blocker. *J Thorac Cardiovasc Surg* 1981; **82**: 542–6
- 56 Hagihira S, Takashina M, Mashimo T. Application of a newly designed right-sided, double-lumen endobronchial tube in patients with a very short right mainstem bronchus. *Anesthesiology* 2008; **109**: 565–8
- 57 Hammer GB, Fitzmaurice BG, Brodsky JB. Methods for single-lung ventilation in pediatric patients. *Anesth Analg* 1999; **89**: 1426–9
- 58 Hammer GB, Manos SJ, Smith BM, Skarsgard ED, Brodsky JB. Single-lung ventilation in pediatric patients. *Anesthesiology* 1996; **84**: 1503–6



- 59 Hampton T, Armstrong S, Russell WJ. Estimating the diameter of the left main bronchus. *Anaesth Intensive Care* 2000; **28**: 540–2
- 60 Hannallah M. Evaluation of tracheal tube exchangers for replacement of double-lumen endobronchial tubes. *Anesthesiology* 1992; **77**: 609–10
- 61 Hannallah MS, Benumof JL, Bachenheimer LC, Mundt DJ. The resting volume and compliance characteristics of the bronchial cuff of left polyvinyl chloride double-lumen endobronchial tubes. *Anesth Analg* 1993; **77**: 1222–6
- 62 Hannallah MS, Benumof JL, Ruttimann UE. The relationship between left mainstem bronchial diameter and patient size. *J Cardiothorac Vasc Anesth* 1995; **9**: 119–21
- 63 Hannallah M, Benumof JL, Silverman PM, Kelly LC, Lea D. Evaluation of an approach to choosing a left double-lumen tube size based on chest computed tomographic scan measurement of left mainstem bronchial diameter. *J Cardiothorac Vasc Anesth* 1997; **11**: 168–71
- 64 Hernandez AA, Wong DH. Using a Glidescope for intubating with a double-lumen endotracheal tube. *Can J Anaesth* 2005; **52**: 658–9
- 65 Higgs A, Clark E, Premraj K. Low-skill fiberoptic intubation: use of the Aintree Catheter with the classic LMA. *Anaesthesia* 2005; **60**: 915–20
- 66 Hirabayashi Y, Seo N. The Airtraq laryngoscope for placement of double-lumen endobronchial tube. *Can J Anaesth* 2007; **54**: 955–7
- 67 Ho AM, Karmakar MK, Lam WW, et al. Does the presence of a tracheal bronchus affect the margin of safety of double-lumen tube placement? *Anesth Analg* 2004; **99**: 293–5
- 68 Inoue H. Univent endotracheal tube: twelve-year experience. *J Thorac Cardiovasc Surg* 1994; **107**: 1171–2
- 69 Kabon B, Waltl B, Leitgeb J, Kapral S, Zimpfer M. First experience with fiberoptically directed wire-guided endobronchial blockade in severe pulmonary bleeding in an emergency setting. *Chest* 2001; **120**: 1399–402
- 70 Kamaya H, Krishna PR. New endotracheal tube (Univent tube) for selective blockade of one lung. *Anesthesiology* 1985; **63**: 342–3
- 71 Karwande SV. A new tube for single lung ventilation. *Chest* 1987; **92**: 761–3
- 72 Katsnelson T, Frost EAM, Farcon E, et al. When the endotracheal tube will not pass over the flexible fiberoptic bronchoscope. *Anesthesiology* 1992; **76**: 151–2
- 73 Kelley JG, Gaba DM, Brodsky JB. Bronchial cuff pressures of two tubes used in thoracic surgery. *J Cardiothorac Vasc Anesth* 1992; **6**: 190–2
- 74 Kraenzler EJ, Rice TW, Stein SL, Insler SR. Bilateral bronchial blockers for bilateral pulmonary resections in a patient with a previous laryngectomy. *J Cardiothorac Vasc Anesth* 1997; **11**: 201–2
- 75 Lammers CR, Hammer GB, Brodsky JB, Cannon WB. Failure to separate and isolate the lungs with an endotracheal tube positioned in the bronchus. *Anesth Analg* 1997; **85**: 946–7
- 76 Larson CE, Gasior TA. A device for endobronchial blocker placement during one-lung anesthesia. *Anesth Analg* 1990; **71**: 311–2
- 77 Latto IP, Stacey M, Mecklenburgh J, Vaughan RS. Survey of the use of the gum elastic bougie in clinical practice. *Anaesthesia* 2002; **57**: 379–84
- 78 Lieberman D, Littleford J, Horan T, Unruh H. Placement of left double-lumen endobronchial tubes with or without a stylet. *Can J Anaesth* 1996; **43**: 238–42
- 79 Lohser J, Umedaly HS, Fitzmaurice BG. Do-it-yourself modified right-sided Broncho-Cath double lumen tube. *Can J Anaesth* 2007; **54**: 675
- 80 MacGillivray RG. Evaluation of a new tracheal tube with a movable bronchus blocker. *Anaesthesia* 1988; **43**: 687–9
- 81 Marco CA, Marco AP. Airway adjuncts. *Emerg Med Clin North Am* 2008; **26**: 1015–27
- 82 Matthew EB, Hirschmann RA. Placing double-lumen tubes with a fiberoptic bronchoscope. *Anesthesiology* 1986; **65**: 118–9
- 83 Matthews AJ, Sanders SJ. Single-lung ventilation via a tracheostomy using a fiberoptically-directed 'steerable' endobronchial blocker. *Anaesthesia* 2001; **56**: 494
- 84 Merli G, Guarino A, Della Rocca G, et al. Recommendations for airway control and difficult airway management in thoracic anesthesia and lung separation procedures. *Minerva Anestesiol* 2009; **75**: 59–78
- 85 Merlone SC, Shulman MS, Allen MD, Mark JB. Prolonged intubation with a polyvinylchloride double-lumen endobronchial tube. *J Cardiothorac Anesth* 1987; **1**: 563–4
- 86 Mort TC. Continuous airway access for the difficult extubation: the efficacy of the airway exchange catheter. *Anesth Analg* 2007; **105**: 1357–62
- 87 Munir MA, Albataineh JI, Jaffar M. An alternative way to use Fogarty balloon catheter for perioperative lung isolation. *Anesthesiology* 2003; **99**: 240–1
- 88 Narayanaswamy M, McRae K, Slinger P, et al. Choosing a lung isolation device for thoracic surgery: a randomized trial of three bronchial blockers versus double-lumen tubes. *Anesth Analg* 2009; **108**: 1097–101
- 89 O'Connor CJ, O'Connor TA. Use of lighted stylets to facilitate insertion of double-lumen endobronchial tubes in patients with difficult airway anatomy. *J Clin Anesth* 2006; **18**: 616–9
- 90 Park HP, Bahk JH, Park JH, Oh YS. Use of a Fogarty catheter as a bronchial blocker through a single-lumen endotracheal tube in patients with subglottic stenosis. *Anaesth Intensive Care* 2003; **31**: 214–6
- 91 Partridge L, Russell WJ. The margin of safety of a left double-lumen tracheobronchial tube depends on the length of the bronchial cuff and tip. *Anaesth Intensive Care* 2006; **34**: 618–20
- 92 Patane PS, Sekk BA, Mahla ME. Awake fiberoptic endobronchial intubation. *J Cardiothorac Vasc Anesth* 1990; **4**: 229–31
- 93 Perlin DI, Hannallah MS. Double-lumen tube placement in a patient with a difficult airway. *J Cardiothorac Vasc Anesth* 1996; **10**: 787–8
- 94 Poon KH, Liu EH. The Airway Scope for difficult double-lumen tube intubation. *J Clin Anesth* 2008; **20**: 319
- 95 Pott LM, Murray WB. Review of video laryngoscopy and rigid fiberoptic laryngoscopy. *Curr Opin Anaesthesiol* 2008; **21**: 750–8
- 96 Practice guidelines for management of the difficult airway. An updated report by the American Society of Anesthesiologists Task Force on management of the difficult airway. *Anesthesiology* 2003; **98**: 1269–77
- 97 Purut CM, Scott SM, Parham JV, Smith PK. Intraoperative management of severe endobronchial hemorrhage. *Ann Thorac Surg* 1991; **51**: 304–6
- 98 Renton MC, Conacher ID. Single-lung ventilation via a double lumen tube in a patient with a tracheostomy. *Anaesthesia* 2002; **57**: 197–8
- 99 Riley RH, Marples IL. Relocation of a double-lumen tube during patient positioning. *Anesth Analg* 1992; **75**: 1071
- 100 Roscoe A, Kanellakos GV, McRae K, Slinger P. Pressures exerted by endobronchial devices. *Anesth Analg* 2007; **104**: 655–8

- 101 Rowe R, Andropoulos D, Heard M, Johnson K, DeCampi W, Idowu O. Anesthetic management of pediatric patients undergoing thoracoscopy. *J Cardiothorac Vasc Anesth* 1994; **8**: 563–6
- 102 Ruiz P. Sequential lobar-lung-lobar isolation using a deflecting tip bronchial blocker. *J Clin Anesth* 2006; **18**: 620–3
- 103 Russell WJ. A logical approach to the selection and insertion of double-lumen tubes. *Curr Opin Anaesthesiol* 2008; **21**: 37–40
- 104 Saito S, Dohi S, Naito H. Alteration of double-lumen endobronchial tube position by flexion and extension of the neck. *Anesthesiology* 1985; **62**: 696–7
- 105 Sakles JC, Rodgers R, Keim SM. Optical and video laryngoscopes for emergency airway management. *Intern Emerg Med* 2008; **3**: 139–43
- 106 Sandberg WS. Endobronchial blocker dislodgement leading to pulseless electrical activity. *Anesth Analg* 2005; **100**: 1728–30
- 107 Satya-Krishna R, Popat M. Insertion of the double lumen tube in the difficult airway. *Anaesthesia* 2006; **61**: 896–8
- 108 Scanzillo MA, Shulman MS. Lighted stylet for placement of a double-lumen endobronchial tube. *Anesth Analg* 1995; **81**: 205–6
- 109 Seed RF, Wedley JR. Tracheal intubation with a Robertshaw tube via a tracheostomy. *Br J Anaesth* 1977; **49**: 639
- 110 Seitz PA, Gravenstein N. Endobronchial rupture from endotracheal reintubation with an endotracheal tube guide. *J Clin Anesth* 1989; **1**: 214–7
- 111 Shulman GB, Connelly NR. Double lumen tube placement with the Bullard laryngoscope. *Can J Anaesth* 1999; **46**: 232–4
- 112 Shulman MS, Brodsky JB, Levesque PR. Fiberoptic bronchoscopy for tracheal and endobronchial intubation with a double-lumen tube. *Can J Anaesth* 1987; **34**: 172–3
- 113 Simpson PM. Tracheal intubation with a Robertshaw tube via a tracheostomy. *Br J Anaesth* 1976; **48**: 373–5
- 114 Sivalingam P, Tio R. Tension pneumothorax, pneumomediastinum, pneumoperitoneum, and subcutaneous emphysema in a 15-year-old Chinese girl after a double-lumen tube intubation and one-lung ventilation. *J Cardiothorac Vasc Anesth* 1999; **13**: 312–5
- 115 Slinger P. A view of and through double-lumen tubes. *J Cardiothorac Vasc Anesth* 2003; **17**: 287–8
- 116 Slinger PD. Fiberoptic bronchoscopic positioning of double-lumen tubes. *J Cardiothorac Anesth* 1989; **3**: 486–96
- 117 Slinger PD, Chripko D. A clinical comparison of bronchial cuff pressures in three different designs of left double-lumen tubes. *Anesth Analg* 1993; **77**: 305–8
- 118 Slinger PD, Lesiuk L. Flow resistances of disposable double-lumen, single-lumen, and Univent tubes. *J Cardiothorac Vasc Anesth* 1998; **12**: 142–4
- 119 Smith CE, Kareti M. Fiberoptic laryngoscopy (WuScope) for double-lumen endobronchial tube placement in two difficult-intubation patients. *Anesthesiology* 2000; **93**: 906–7
- 120 Spicek-Macan J, Hodoba N, Nikolic I, Stancic-Rokotov D, Kolaric N, Popovic-Grle S. Exsanguinating tuberculosis-related hemoptysis: bronchial blocker introduced through percutaneous tracheostomy. *Minerva Anestesiol* 2009; **75**: 405–8
- 121 Stene R, Rose M, Weinger MB, Benumof JL, Harrell J. Bronchial trifurcation at the carina complicating use of a double-lumen tracheal tube. *Anesthesiology* 1994; **80**: 1162–4
- 122 Sustić A, Miletić D, Protić A, Ivancić A, Cicvarić T. Can ultrasound be useful for predicting the size of a left double-lumen bronchial tube? Tracheal width as measured by ultrasonography versus computed tomography. *J Clin Anesth* 2008; **20**: 247–52
- 123 Suzuki A, Kunisawa T, Iwasaki H. Double lumen tube placement with the Pentax-Airway Scope. *Can J Anaesth* 2007; **54**: 853–4
- 124 Suzuki A, Uraoka M, Kimura K, Stao S. Effects of using two-airway exchange catheters on laryngeal passage during change from a double-lumen tracheal tube to a single-lumen tracheal tube. *Br J Anaesth* 2007; **99**: 440–3
- 125 Takita K, Morimoto Y, Kemmotsu O. The height-based formula for prediction of left-sided double-lumen tracheal tube depth. *J Cardiothorac Vasc Anesth* 2003; **17**: 412–3
- 126 Tanabe S, Tanaka A, Nishino T. Experience using an improved bronchial blocker (Phycon TCB bronchial blocker). *Masui* 2004; **53**: 1317–9
- 127 Taylor S, Walford A, McLellan I. A disposable double-lumen tracheostomy tube—a prototype. *Anaesth Intensive Care* 1984; **12**: 57–8
- 128 Thierbach AR, Werner CL. Infraglottic airway devices and techniques. *Best Pract Res Clin Anaesthesiol* 2005; **19**: 595–609
- 129 Thomas V, Neustein SM. Tracheal laceration after the use of an airway exchange catheter for double-lumen tube placement. *J Cardiothorac Vasc Anesth* 2007; **21**: 718–9
- 130 Thong SY, Lim Y. Video and optic laryngoscopy assisted tracheal intubation—the new era. *Anaesth Intensive Care* 2009; **37**: 219–33
- 131 Uzuki M, Kanaya N, Mizuguchi A, et al. One-lung ventilation using a new bronchial blocker in a patient with tracheostomy stoma. *Anesth Analg* 2003; **96**: 1538–9
- 132 Veit AM, Allen RB. Single-lung ventilation in a patient with a freshly placed percutaneous tracheostomy. *Anesth Analg* 1996; **82**: 1292–3
- 133 Vlachtsis H, Veltman M. Shearing of a Frova intubating introducer by a Bronchocath double lumen tube. *Anaesthesia* 2006; **61**: 197–8
- 134 Voyagis GS, Dimitriou V, Koukou E. Light-guided tracheal intubation with a double lumen endobronchial tube assisted by the intubating laryngeal mask airway. *Eur J Anaesthesiol* 1999; **16**: 420–1
- 135 Voyagis GS, Palumbi C. Use of the laryngeal mask for management of the compromised airway—a case report. *Middle East J Anesthesiol* 1998; **14**: 275–80
- 136 Watanabe R. Modified long Trachlight wand for a double-lumen endobronchial tube. *J Anesth* 2004; **18**: 144–5
- 137 Yazigi A, Madi-Jebara S, Haddad F, Antakly MC. Relocation of a double-lumen tube during surgical dissection. *Anesth Analg* 1993; **77**: 1303
